# Supplementary material for: Phylogenetic distribution of translational GTPases in bacteria
Source: PubMed Central journal article supplement (PMC1780047; doi:10.1186/1471-2164-8-15), 2007-01-10

**Supplementary Material, Fig. S1.** All cases of translational GTPases with "restorable functionality".

## I Frameshifts

**A. & B.** SelB (*selB*) [YPO4052] from *Yersinia pestis* CO92 and SelB [Yp3965] *Yersinia pestis* biovar *Mediavalis*

```

181 CATGAGAAAGtttttggcgaacatggtggcgggggggggggcggtatTGAtcacgctctgTT 240
1      F L A N M L A G G G R Y *
+1      G G G G I D H A L

```

**C.** RF-3 (*prfC*) [SO1210.1 & SO1211] *Shewanella onediensis*

```

801 GGAGTGGgctccaaaacgttgccccgtgaaagtgatctacgcaTGAtcatgccagatGAA 870
1      A P K R C P V K V I Y A *
-1      K T L P R E S D L R M I M P D

```

**D.** CysN (*cysN*) [BP0971] *Bordetella pertussis*

```

361 gccgccatcatcctggtcgacgcgacgcgacgcgcgggcgggccgacgggcggtgctggccC 420
1 A A I I L V D A T R R G R P T
+5      R R D A T R A A D G R L L A

```

**E.** EF-Tu (*tufA* and *tufB*) [gi|27364609] in *Vibrio vulnificus* CMCP6 *tufB* has C insertion in genome position 1182683

```

1324113
tufA ATCACAatctctacttctcacgta-gagtacgacactccagctcgccactacgcacacGT 1324171
|||||
tufB181 ATCACAatctctacttctcacgtacggagtacgacactccagctcgccactacgcacacGT 240
1 I S T S H V R V R H S S S P L
+1      E Y D T P A R H Y A H

```

**F.** EF-G (*fus*) *Shigella flexneri* 2a compared with *fus* gene from 2a 2457T [gi|30065374] there is C insertion in the strain 2a 2457T

```

2a 1 atggctcgtacaacacccatcgcacg-ctaccgtaacatcggtatcagtgcgcacATCGA 60
|||||
2457T 1 atggctcgtacaacacccatcgcacgcctaccgtaacatcggtatcagtgcgcacATCGA 60
1 M A R T T P I A R L P *
+1      Y R N I G I S A H

```

**G.** EF-G (*fus*) *Mycobacterium bovis* *fus2B* gene [gi|31791298] is compared with *fus* gene from *Mycobacterium tuberculosis*

```

tubercu-
losis F V G E L R A G L R A A D C A L F V I A
ttcgtgggtgagctgcgggccgggttgcgggcccgcgattgcgcaactgttcgtgatcgcg
|||||
bovis 301 TTCGTGGGTgagctGTGg-ccgggttgcgggcccgcgattgcgcaactgttcGTGAtcgcg 359
1 E L W P G C G P P I A H C S *
-1 V A G L R A A D C A L F V I A

```

**H.** EF-G (*fus*) [N-term gi|27365097, C-term gi|27365098] *Vibrio vulnificus* CMCP6

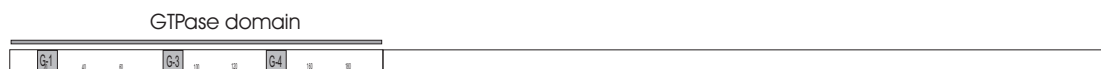

```

1051 ggccgtatggtggaaaATGcacgcaaacgaccgTAACgaacttgaagcagctcaagcgggt 1111
1 G R M V E N A R K R P *
+1 M H A N D R N E L E A A Q A G

```

Supplement 1.

I. RF-3 (*prfC*) [gi|54307829] *Photobacterium profundum* SS9

961 acttataccaaggca**TGA**aa**ATG**aaccatgtacgtattggtaaaaatgtcagtattTCTG 1020  
1 T Y T K A \*  
-1 M K M N H V R I G K N V S I

J. TypA (*typA*) [gi|56752520] *Synechococcus elongatus* PCC

1081 cggggtgaactacactcggcattc**TGA**tcgaaacg**ATG**cgtcgcgaaggttatgagttcC 1140  
1 R G E L H S A F \*  
-1 M R R E G Y E F

## II Alternative start position

### A. EF-Tu (*tuf*) [gi|29653575] *Coxiella burnetii*

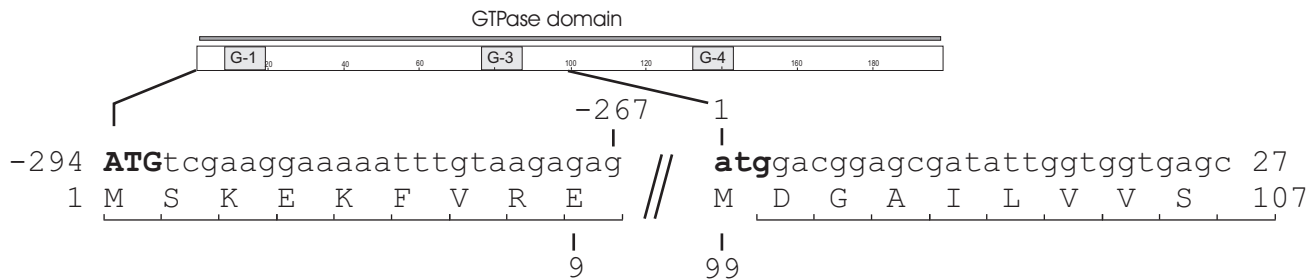

### B. SelB (*selB*) [gi|54303209] *Photobacterium profundum* SS9

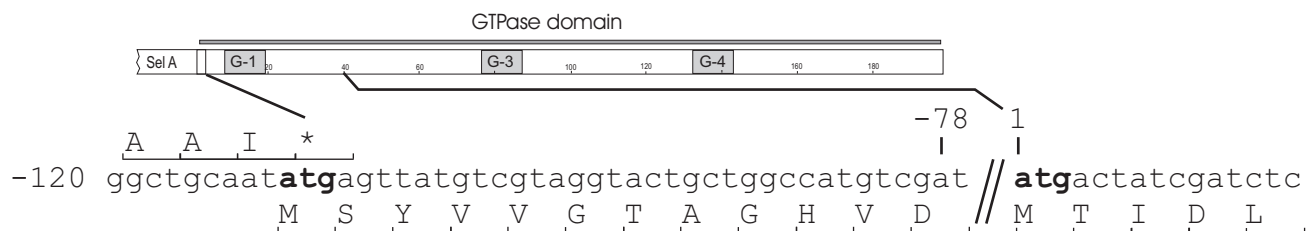

### C. TypA (*typA*) [gi|32267271] *Helicobacter hepaticus*

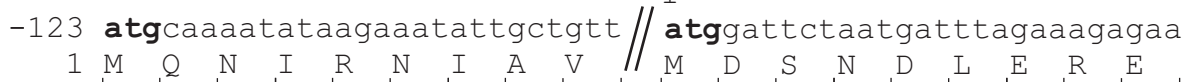

### D. TypA (*typA*) [gi|21910714] *Streptococcus pyogenes*

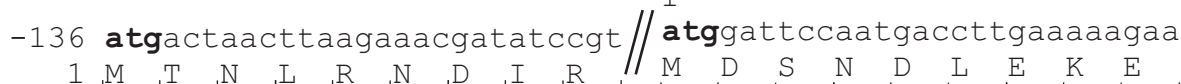

### E. TypA (*typA*) [gi|21230395] *Xanthomonas campestris*

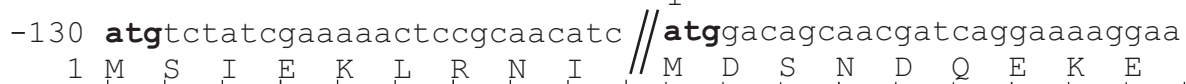

### F. LepA (*lepA*) [gil|15594434] *Borrelia burgdorferi*

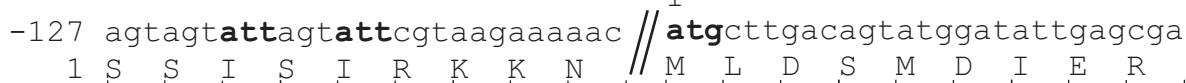

### G. LepA (*lepA*) [gil|52081100] *Bacillus licheniformis* ATCC 14580

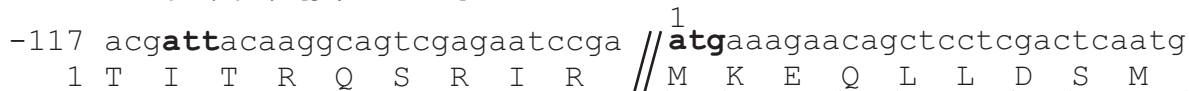

Supplement: 1471-2164-8-15-S1.pdf [file 1471-2164-8-15-S1.pdf]
